# Supplementary material for: Interstitial flows promote amoeboid over mesenchymal motility of breast cancer cells revealed by a three dimensional microfluidic model
Source: Royal Society of Chemistry journal article supplement (doi:10.1039/c5ib00115c), 2015-01-01
Supplement: c5ib00115c1.pdf [file c5ib00115c1.pdf]

## Supplementary Materials for Huang *et al.* manuscript

### Movies

Each of the following movies contains a series of 96 images, with 5 minutes interval and a total of 7.5 hrs duration. The movie is post processed using ImageJ, and played at 15 fps. Each frame size is  $480 \times 360$  pixels or  $309.9 \times 232.2 \mu\text{m}$ .

1. Smovie 1: MDA-MB-231 cells embedded in collagen matrix in the absence of the flow.
2. Smovie 2: MDA-MB-231 cells embedded in collagen matrix in the presence of the flow (flow direction: from right to left).
3. Smovie 3: Single MDA-MB-231 cell migrating in an amoeboid mode.
4. Smovie 4: Single MDA-MB-231 cell migrating in a mesenchymal mode.

### Figures

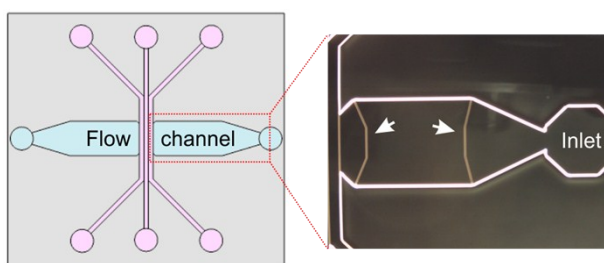

Figure S1: Schematic of the microfluidic device containing contact lines (cross section size of  $10 \mu\text{m} \times 5 \mu\text{m}$ ) as indicated by the white arrows on the surface of the horizontal flow channel. These special contact lines are designed to avoid trapping bubbles when flow is initially introduced into the flow channel inlet.

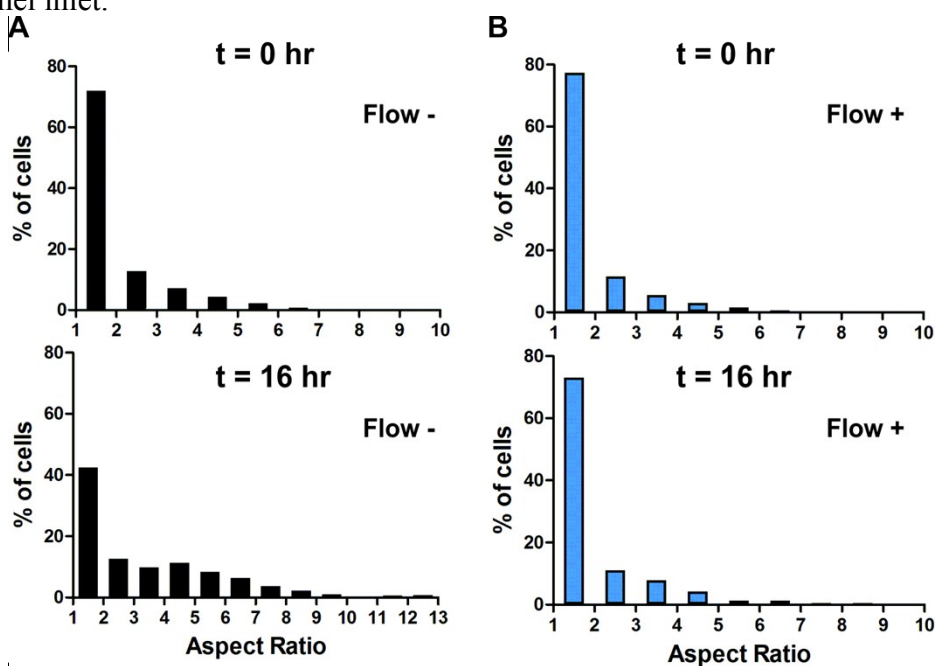

Figure S2: Histograms of cell aspect ratio at  $t = 0$  hr and  $t = 16$  hr in the absence (A) and presence (B) of interstitial flows of  $2 \mu\text{m/s}$  of three independent experiments (including the one shown in Fig. 2 of the main text). 600 cells are analyzed in each condition.

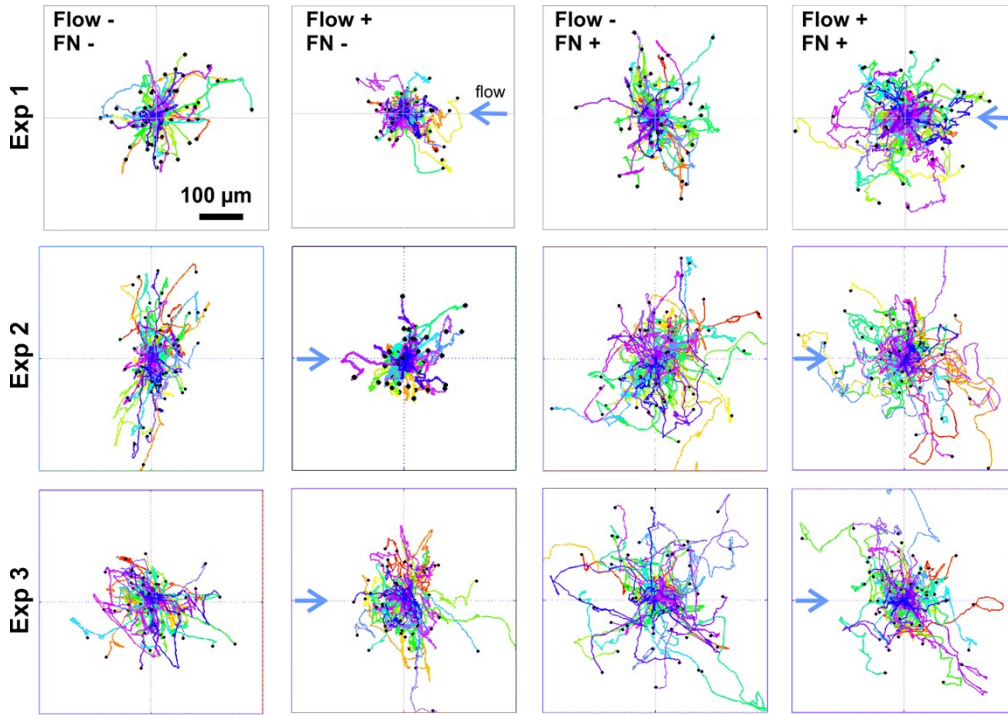

Figure S3: Cell trajectories from three independent experiments. Each colored line is a cell track of 16 hours duration. 60 cells were tracked in each condition. Flow rate is  $2 \mu\text{m/s}$ , and FN concentration is  $100 \mu\text{g/mL}$ .

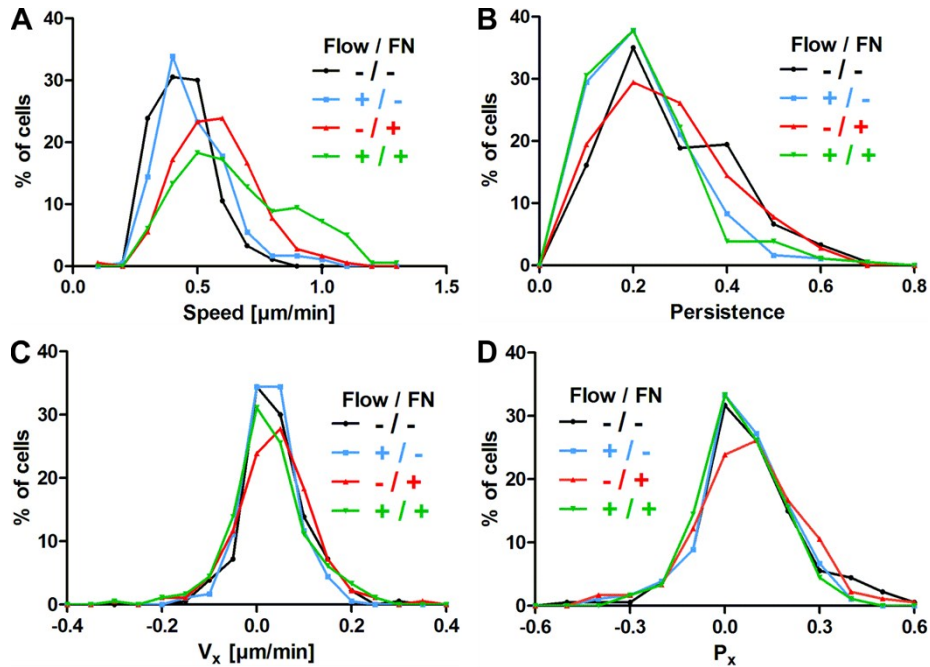

Figure S4: Histograms of cell motilities parameters: (A) average speed; (B) migration persistence (C) cell velocity along the flow direction; (D) persistence along the flow direction under four flow and FN conditions. Each plot represent a combined cell population of three experiments.

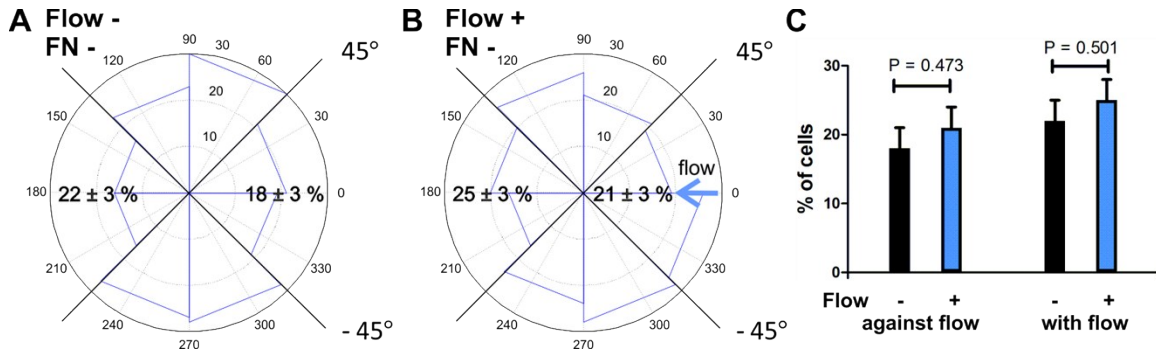

Figure S5: Polar histograms indicated cell migration direction in the absence (A) and presence (B) of flows. (C) Percentage of cells migrate along/against the flow in the absence/presence of the flow. Error bars represent the standard error. Here, if cells migrate within  $45^\circ$  with respect to the flow direction, cells are considered migrating along/against flow direction. The percentages at the left and right quarters indicate the percentage of cells migrate along or against the flow direction, respectively. Each polar plot shows three combined independent experiment results.

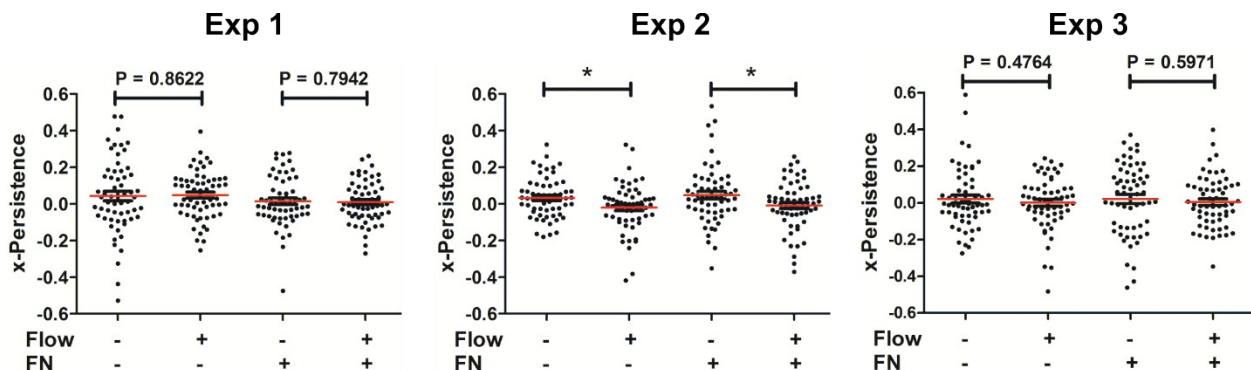

Figure S6: Average cell migration persistence in the flow direction ( $x$ -persistence) for three repeated independent experiments.

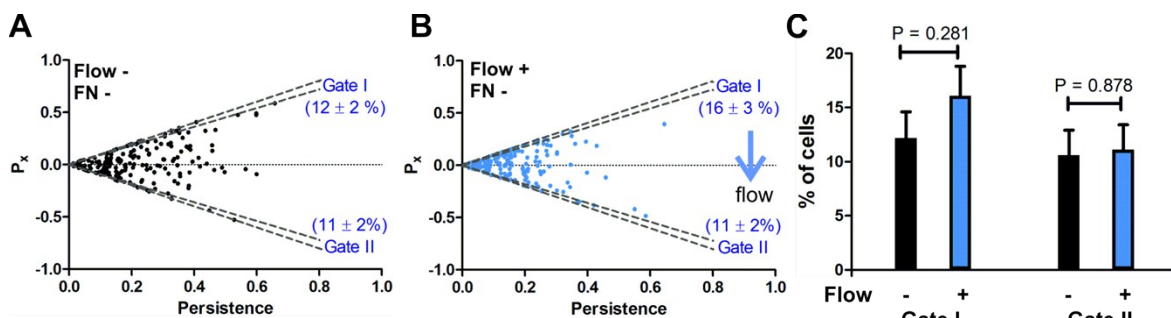

Figure S7: Gated  $P_x$  versus the cell persistence analysis of directed cell migration in the absence (A) and presence (B) of flow. The gated criteria is that  $P_x$  is above 90% of the average persistence (or within  $26^\circ$  with respect to the flow direction) for cells within Gate I and II. Each plot shows the combined cell data points (a total of 180) from three experiments. Flow direction is downward. (C) Percentage of cells migrate against (Gate I) or along (Gate II) the flow. Error bars represent the standard error.

|  |  |                                 |                                |                      |
|--|--|---------------------------------|--------------------------------|----------------------|
|  |  | Polacheck <i>et. al.</i> (2011) | Haessler <i>et. al.</i> (2012) | Huang <i>et. al.</i> |
|--|--|---------------------------------|--------------------------------|----------------------|

|                                       |                                                                          | PNAS                                                                                                                      | Integrative Biology                                                                                                                                  | This manuscript                                                                                      |
|---------------------------------------|--------------------------------------------------------------------------|---------------------------------------------------------------------------------------------------------------------------|------------------------------------------------------------------------------------------------------------------------------------------------------|------------------------------------------------------------------------------------------------------|
| Flow experiment set up                | Cell Line                                                                | MDA-MB-231                                                                                                                | MDA-MB-231                                                                                                                                           | MDA-MB-231                                                                                           |
|                                       | Cell Density                                                             | High: $2.5 \times 10^5$ cells/mL<br>Low: $0.5 \times 10^5$ cells/mL                                                       | $2.5 \times 10^5$ cells/mL                                                                                                                           | $1.0 \times 10^6$ cells/mL                                                                           |
|                                       | Flow Speed                                                               | 0.3 and 3.0 $\mu\text{m/s}$                                                                                               | 10 $\mu\text{m/s}$                                                                                                                                   | 2.0 $\mu\text{m/s}$                                                                                  |
|                                       | Flow Generation                                                          | 40 Pa Pressure head                                                                                                       | Peristaltic pump                                                                                                                                     | Syringe pump                                                                                         |
|                                       | 3D ECM                                                                   | 2.0 mg/mL type I collagen (PH=8.9)                                                                                        | 1.5 mg/mL type I collagen with 10%matrigel (PH=7.4, private communication)                                                                           | 1.5 mg/mL type I collagen (PH=7.4)                                                                   |
|                                       | Pre-incubation                                                           | overnight incubation                                                                                                      | overnight incubation                                                                                                                                 | no pre-incubation                                                                                    |
|                                       | Medium supplement                                                        | 10 ng/mL EGF                                                                                                              | no additional supplement                                                                                                                             | no additional supplement                                                                             |
|                                       | Imaging                                                                  | 15min interval for 16-24 hr                                                                                               | 15min interval for 16 hr                                                                                                                             | 5min interval for 16 hr                                                                              |
| Results and interstitial flows effect | Average cell speed in static condition                                   | 0.1 $\mu\text{m/min}$                                                                                                     | 0.17 $\mu\text{m/min}$                                                                                                                               | 0.36 $\mu\text{m/min}$                                                                               |
|                                       | Motile cell speed gate                                                   | one cell diameter in 8hr                                                                                                  | 0.02 $\mu\text{m/min}$                                                                                                                               | 0.2 $\mu\text{m/min}$                                                                                |
|                                       | Motility of entire cell population                                       | No significant effect                                                                                                     | flow increases population of motile cells                                                                                                            | -                                                                                                    |
|                                       | Average cell speed/velocity                                              | no significant effect on average velocity                                                                                 | flow increases average speed, also reflected on a histogram plot                                                                                     | flow enhances the normalized average speed                                                           |
|                                       | Persistence or directionality                                            | flow increases directionality from 0.39 to 0.63                                                                           | no significant effect on overall average persistence (~0.45)                                                                                         | flow decreases persistence (~0.2)                                                                    |
|                                       | Average $x$ -velocity                                                    | cells prefer to migrate along the streamline                                                                              | no significant effect on overall average $x$ -velocity                                                                                               | no significant effect                                                                                |
|                                       | Directed velocity/directional migration (within $45^\circ$ of $x$ -axis) | <u>high cell density</u> : cells migrate against the flow;<br><u>low cell density</u> : cells migrate along with the flow | flows increase the percentage of cells migrate along with the flow direction                                                                         | no significant effect on directional migration was observed                                          |
|                                       | Directed persistence ( $P^x$ )                                           | -                                                                                                                         | no significant effect on overall average $P^x$ ; flow increases the percentage of cells (5-10%) with $P^x$ both along and against the flow direction | no significant effect on overall average $P^x$ and directed $P^x$ in the flow direction was observed |
|                                       | Morphology                                                               | -                                                                                                                         | -                                                                                                                                                    | flow enhances amoeboid phenotype                                                                     |

Table S1: Summaries of the experimental settings and results from three labs on the roles of interstitial flows on cell motility using microfluidic models.

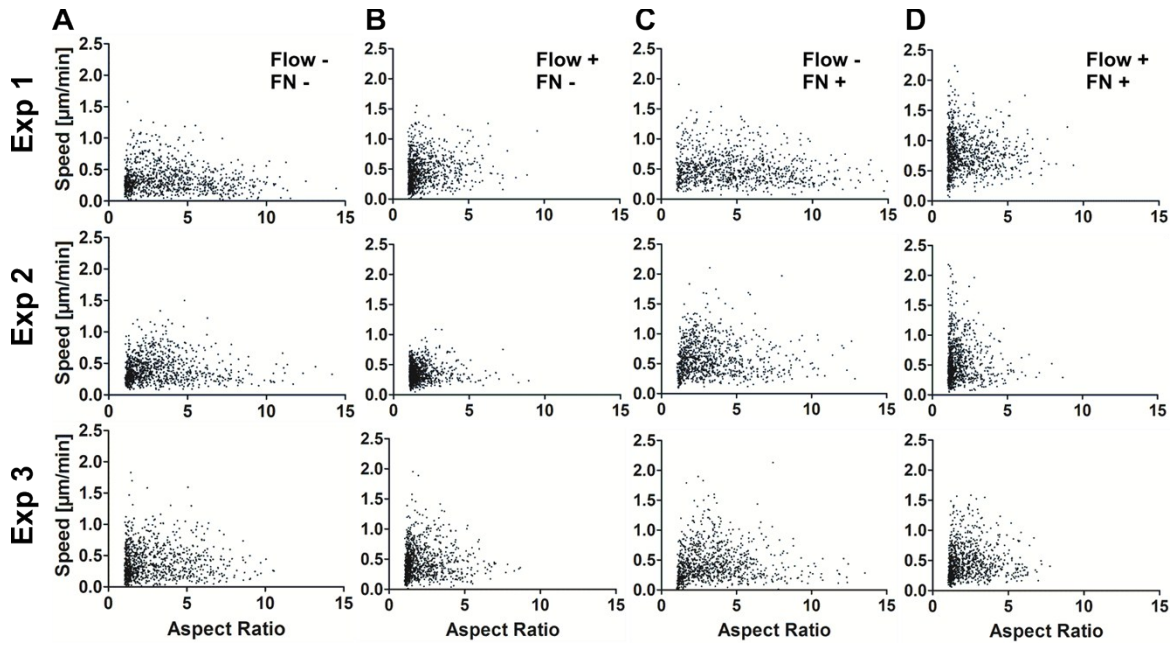

Figure S8: Scatter plots of hourly cell migration speed versus aspect ratio for three repeated independent experiments for four different flow and FN conditions.

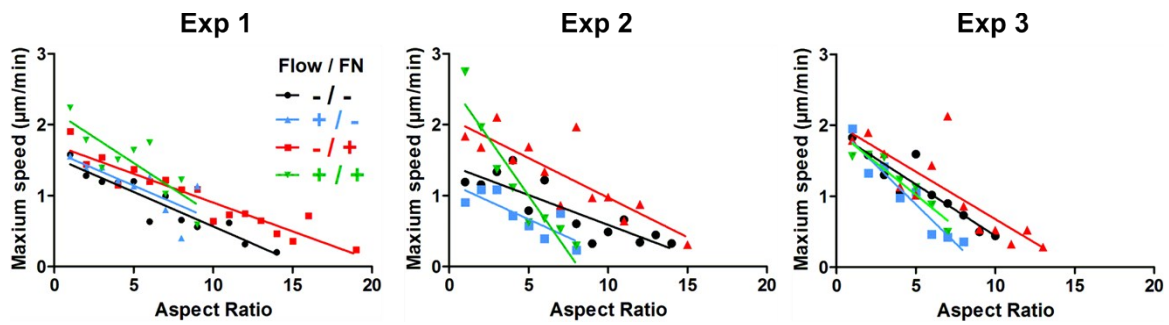

Figure S9: Maximum cell speed at a narrow range of aspect ratio is inversely correlated to the cell aspect ratio for three repeated independent experiments.

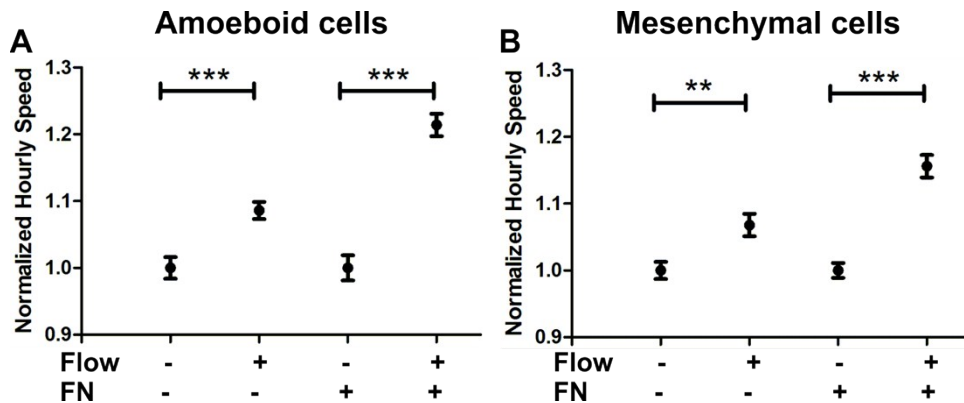

Figure S10: Normalized hourly speed for (A) amoeboid and (B) Mesenchymal cells indicating interstitial flows enhance the speed of both cell types.
